# Supplementary material
Source: PubMed Central journal article supplement (PMC3260058)
Supplement: supp_jn.111.150219_nut_150219_SF1.pdf [file supp_jn.111.150219_nut_150219_SF1.pdf]

Online Supporting Material

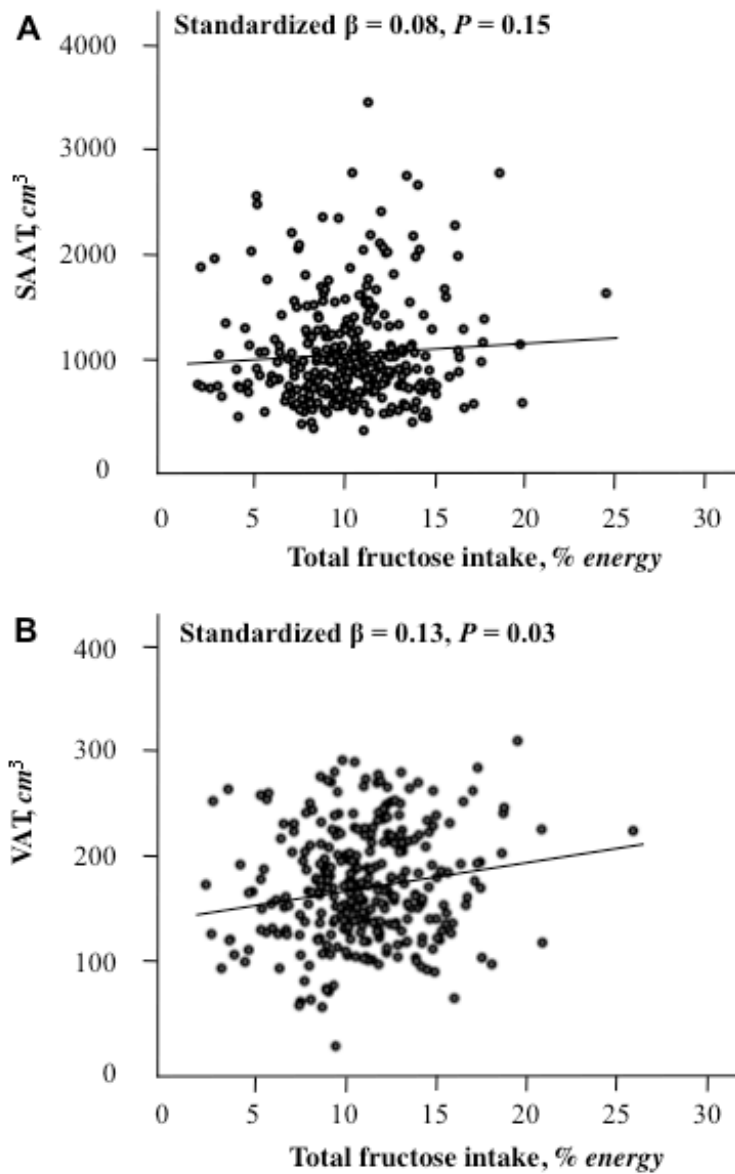

**Supplemental Figure 1** Relationships between total fructose intake (% energy) and type of adiposity in 559 adolescents aged 14-18 years. (A) Total fructose intake vs. SAAT and (B) total fructose intake vs. VAT. Relationships are adjusted for age, sex, race, Tanner stage, FFST mass, fat mass, moderate/vigorous PA, socioeconomic status, energy intake, and fiber intake.
