# Supplementary material
Source: PubMed Central journal article supplement (PMC3260058)
Supplement: supp_jn.111.150219_nut_150219_ST1.pdf [file supp_jn.111.150219_nut_150219_ST1.pdf]

## Online Supporting Material

**Supplemental Table 1** Characteristics of the adolescents aged 14-18 y<sup>1</sup>

|                                         | Value       |
|-----------------------------------------|-------------|
| Age, <i>y</i>                           | 16.2 ± 1.2  |
| Females, %                              | 49.1        |
| Blacks, %                               | 45.1        |
| BMI percentile                          | 61.6 ± 27.8 |
| FFST mass, <i>kg</i>                    | 46.4 ± 9.9  |
| Fat mass, <i>kg</i>                     | 15.9 ± 9.5  |
| SAAT, <i>cm</i> <sup>3</sup>            | 871 ± 735   |
| VAT, <i>cm</i> <sup>3</sup>             | 96 ± 61     |
| Systolic blood pressure, <i>mm Hg</i>   | 111 ± 10    |
| Diastolic blood pressure, <i>mm Hg</i>  | 60 ± 6      |
| Fasting serum glucose, <i>mmol/L</i>    | 4.99 ± 0.41 |
| HOMA-IR                                 | 3.7 ± 2.1   |
| Plasma triglycerides, <i>mmol/L</i>     | 0.77 ± 0.45 |
| Plasma total cholesterol, <i>mmol/L</i> | 3.79 ± 0.74 |
| Plasma LDL cholesterol, <i>mmol/L</i>   | 2.36 ± 0.71 |
| Plasma HDL cholesterol, <i>mmol/L</i>   | 1.22 ± 0.28 |
| Serum leptin, <i>μg/L</i>               | 11.8 ± 12.5 |
| Plasma adiponectin, <i>mg/L</i>         | 8.7 ± 4.7   |
| Plasma resistin, <i>μg/L</i>            | 11.9 ± 6.1  |
| Plasma C-reactive protein, <i>mg/L</i>  | 1.1 ± 2.4   |
| Moderate/Vigorous PA, <i>min/d</i>      | 43 ± 29     |
| Socioeconomic status                    | 34 ± 9      |
| Dietary intake                          |             |

|                                   |             |
|-----------------------------------|-------------|
| Energy, <i>kJ/d</i>               | 8100 ± 2580 |
| Protein, % <i>energy</i>          | 13.9 ± 2.7  |
| Fat, % <i>energy</i>              | 33.4 ± 4.8  |
| Carbohydrate, % <i>energy</i>     | 53.6 ± 6.3  |
| Total fructose                    |             |
| g/d                               | 60.2 ± 24.7 |
| % <i>energy</i>                   | 12.5 ± 3.6  |
| Free fructose                     |             |
| g/d                               | 33.1 ± 16.6 |
| % <i>energy</i>                   | 6.9 ± 3.0   |
| Free sucrose                      |             |
| g/d                               | 54.1 ± 26.3 |
| % <i>energy</i>                   | 11.1 ± 4.0  |
| Fiber                             |             |
| g/d                               | 10.7 ± 4.4  |
| g/4196 kJ                         | 5.6 ± 1.5   |
| Total sugars                      |             |
| g/d                               | 134 ± 53    |
| % <i>energy</i>                   | 27.7 ± 6.7  |
| Added sugars                      |             |
| g/d                               | 89 ± 76     |
| % <i>energy</i>                   | 17.9 ± 12.9 |
| Free fructose subgroups           |             |
| Vegetables, <i>g/d</i>            | 6.1 ± 4.6   |
| Fruit, <i>g/d</i>                 | 7.5 ± 8.9   |
| 100% fruit juices, <i>mL/d</i>    | 48 ± 72     |
| HFCS subgroups                    |             |
| Sugar-sweetened foods, <i>g/d</i> | 60.4 ± 28.7 |

Sugar-sweetened beverages, *mL/d*

576 ± 360

---

Values are means ± SD or %, *n* = 559. FFST, fat-free soft-tissue; SAAT, subcutaneous abdominal adipose tissue; VAT, visceral adipose tissue; PA, physical activity; HFCS, high-fructose corn syrup.
